# Supplementary material for: A Humanized Bone Niche Model Reveals Bone Tissue Preservation Upon Targeting Mitochondrial Complex I in Pseudo-Orthotopic Osteosarcoma
Source: MDPI journal article supplement (doi:10.3390/jcm8122184), 2019-12-11
Supplement: s1 [file s1]

## Supplementary Figures

a

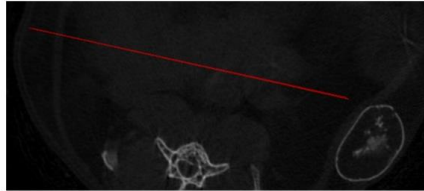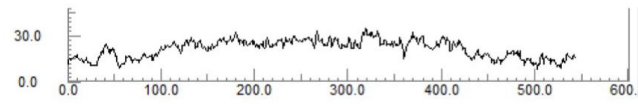

b

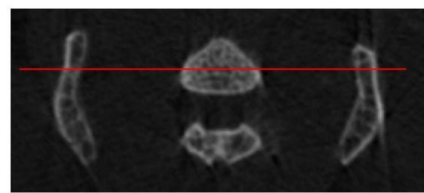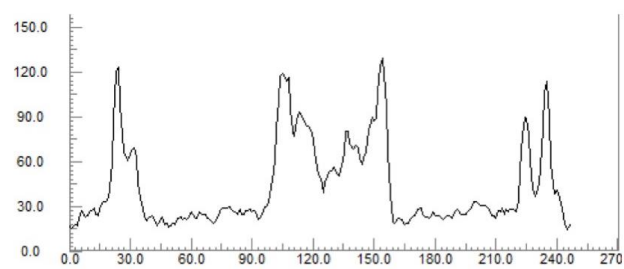

c

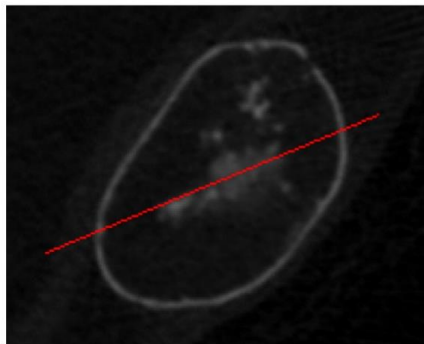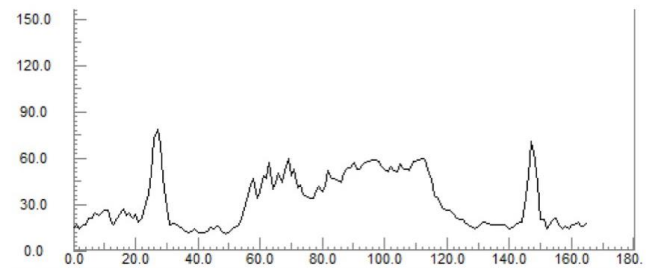

**Supplementary Figure 1.** Micro CT scans of the mouse body sections selecting (a) soft tissue, (b) bone tissue and (c) humanized bone niche control sample.

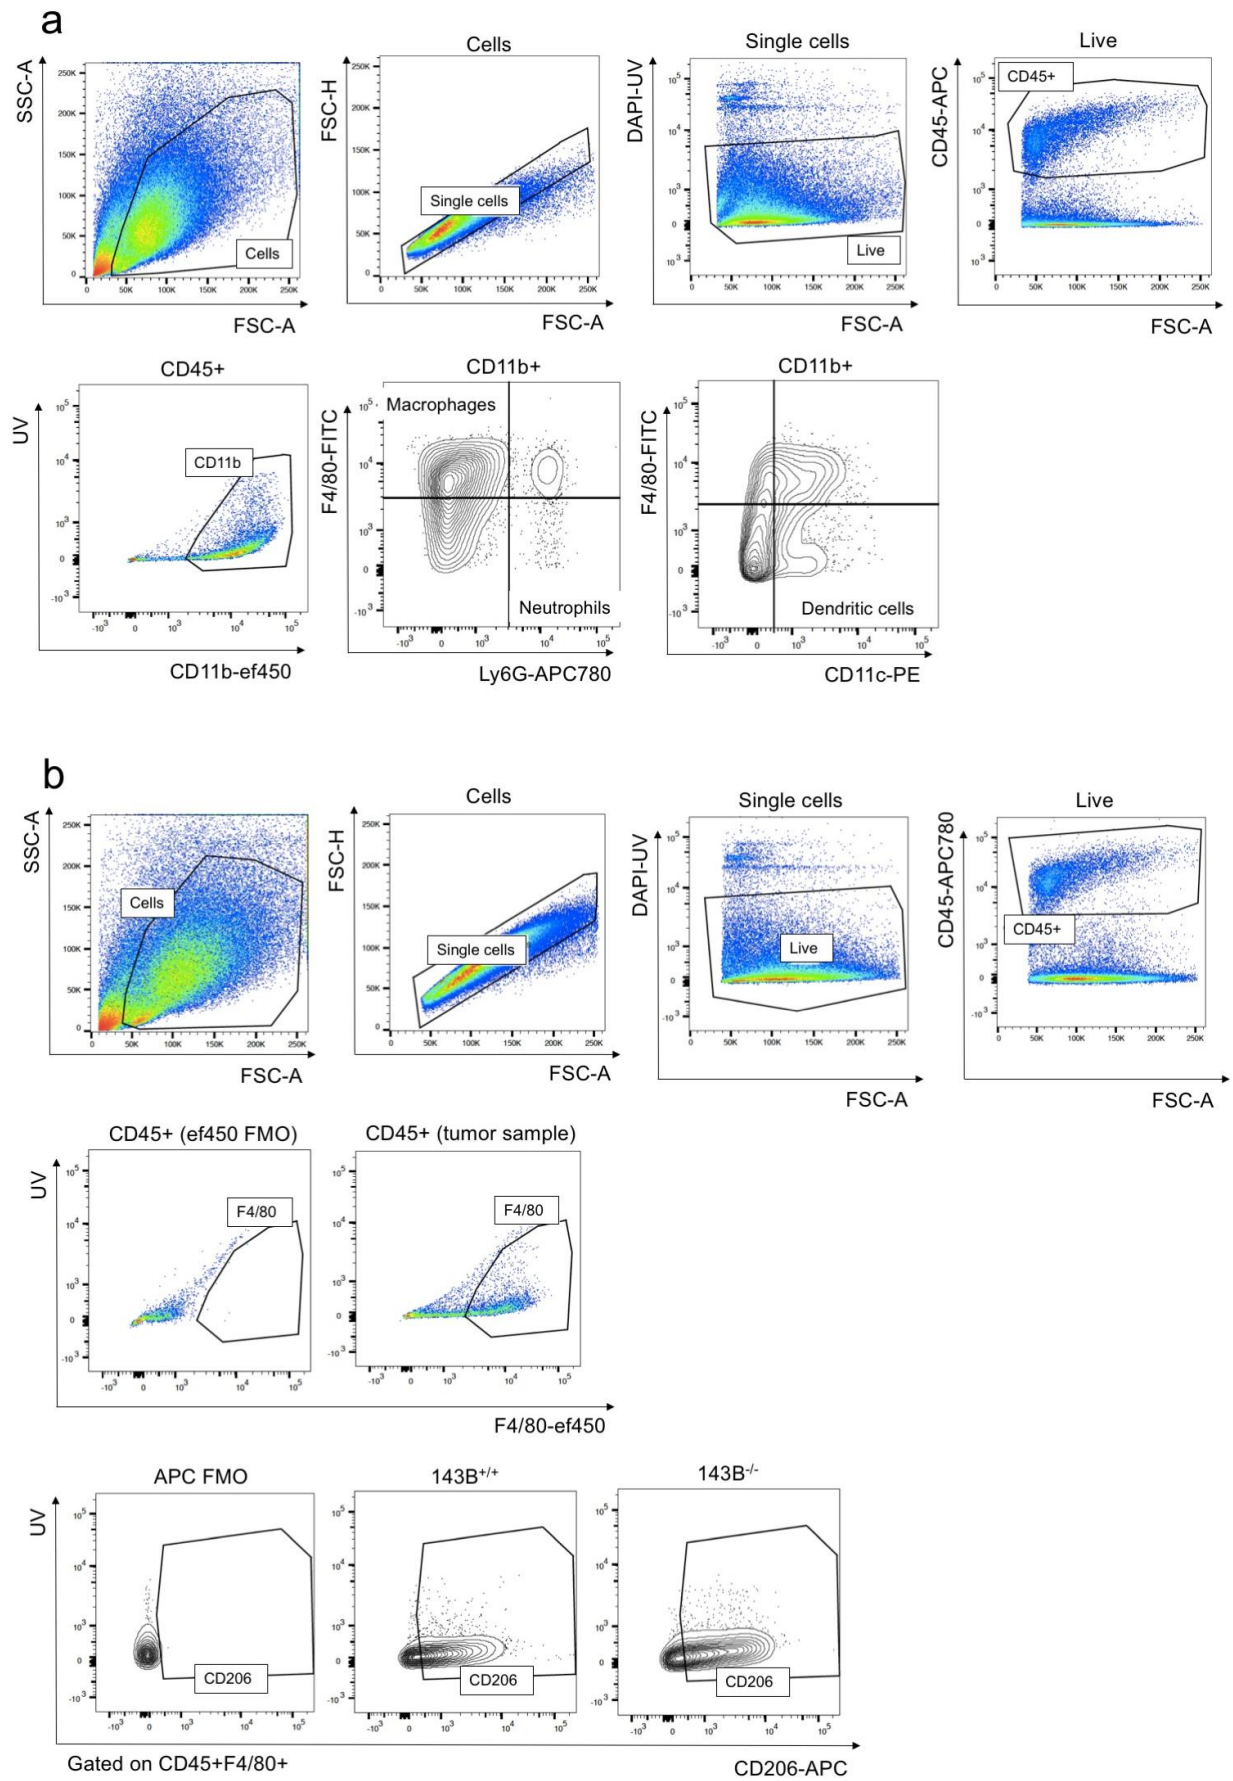

**Supplementary Figure 2.** Gating strategies for flow cytometry analyses of (a) innate immune system cell populations and (b) CD206<sup>+</sup> macrophages.
